# Supplementary material for: Standardized microbial fuel cell anodes of silica-immobilized Shewanella oneidensis
Source: Royal Society of Chemistry journal article supplement (doi:10.1039/c0cc01255f), 2010-01-01

# Standardized microbial fuel cell anodes of silica-immobilized *Shewanella oneidensis*

HR Luckarift<sup>a,b</sup>, S Sizemore<sup>a,b</sup>, J Roy<sup>c</sup>, C Lau<sup>c</sup>, G Gupta<sup>c</sup>, P Atanassov<sup>c</sup>, GR Johnson<sup>a\*</sup>

## Supporting Information

S1. Photograph (A) and schematic diagram (B) of experimental MFC with graphite felt (GF) anodes

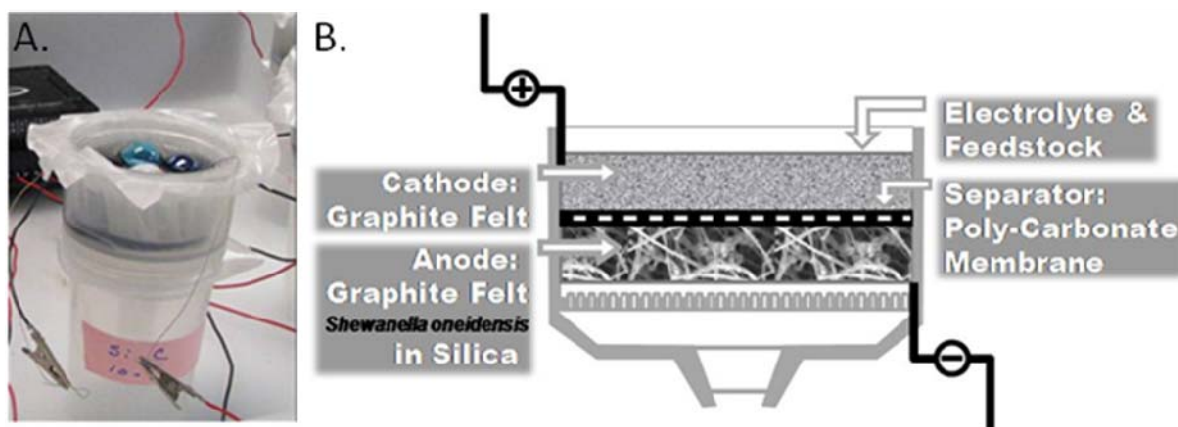

Supplement: c0cc01255f.pdf [file c0cc01255f.pdf]
